# Supplementary material for: Introducing ChatGPT in Undergraduate Research among Nursing Students: A Quasi- experimental Study
Source: Research Square preprint supplement (doi:10.21203/rs.3.rs-5915492/v1), 2025-05-06
Supplement: Supplementary file 1 [file c6f247f4b64cc1e49ef49dff.docx]

Dear Student Participant,

We invite you to participate in this research study aimed at assessing research skills, attitudes toward using ChatGPT in academic writing, and knowledge about ChatGPT. Your participation is entirely voluntary, and your responses will remain confidential. The information gathered will be used for academic research purposes only.

This questionnaire consists of four sections:

1. Demographic Variables – Basic information about age, GPA, gender, and research experience.
2. Research Skills Assessment – An 18-item Likert scale evaluating different aspects of research competency.
3. Attitudes Toward Using ChatGPT in Academic Writing – A 10-item Likert scale measuring perceptions of ChatGPT use.
4. Knowledge of ChatGPT – A 20-item true-or-false section assessing familiarity with ChatGPT.

We appreciate your time and effort in completing this questionnaire. If you have any questions or concerns, please feel free to reach out to the research team.

Thank you for your valuable contribution to this study.

Instructions for Answering the Questionnaire

1. Read each question carefully before selecting your response.
2. Demographic Variables: Provide your details by filling in the blanks or selecting the most appropriate option.
3. Research Skills and Attitudes Sections:
   - Use the 5-point Likert scale to indicate your level of agreement:
     - Strongly Disagree (1)
     - Disagree (2)
     - Neutral (3)
     - Agree (4)
     - Strongly Agree (5)
4. Knowledge of ChatGPT Section:
   - Indicate whether each statement is True (T) or False (F).
5. Answer honestly and based on your personal experiences and opinions.
6. Do not leave any items blank to ensure a complete dataset.

Thank you for your participation!

**Part 1: Demographic Variables**

| **Variable** | **Response Options** |
| --- | --- |
| Age (in years) | ____ (Mean ± SD will be computed) |
| GPA | ____ (Mean ± SD will be computed) |
| Gender | ☐ Male (M) ☐ Female (F) |
| Research Experience | ☐ Yes ☐ No |
| Research Participation | If Yes, indicate percentage: ____% |

**Part 2: Research Skills *(18-item Likert Scale)***

| Planning and Organization | Strongly Disagree | Disagree | Neutral | Agree | Strongly Agree |
| --- | --- | --- | --- | --- | --- |
| 1. I can effectively identify a clear and focused research question. | ☐ | ☐ | ☐ | ☐ | ☐ |
| 1. I am comfortable outlining my research paper structure. | ☐ | ☐ | ☐ | ☐ | ☐ |
| 1. I can ensure a logical flow of ideas in my research. | ☐ | ☐ | ☐ | ☐ | ☐ |

| Literature Review | Strongly Disagree | Disagree | Neutral | Agree | Strongly Agree |
| --- | --- | --- | --- | --- | --- |
| 1. I can search for relevant and credible academic sources. | ☐ | ☐ | ☐ | ☐ | ☐ |
| 1. I can evaluate the credibility of research articles. | ☐ | ☐ | ☐ | ☐ | ☐ |
| 1. I am comfortable summarizing and paraphrasing research sources. | ☐ | ☐ | ☐ | ☐ | ☐ |
| 1. I can integrate and cite relevant research findings. | ☐ | ☐ | ☐ | ☐ | ☐ |

| Critical Analysis | Strongly Disagree | Disagree | Neutral | Agree | Strongly Agree |
| --- | --- | --- | --- | --- | --- |
| 1. I can critically analyze research studies. | ☐ | ☐ | ☐ | ☐ | ☐ |
| 1. I can evaluate potential biases within research articles. | ☐ | ☐ | ☐ | ☐ | ☐ |
| 1. I can draw well-supported conclusions. | ☐ | ☐ | ☐ | ☐ | ☐ |

| Writing Mechanics | Strongly Disagree | Disagree | Neutral | Agree | Strongly Agree |
| --- | --- | --- | --- | --- | --- |
| 1. I am confident in writing clear and concise sentences. | ☐ | ☐ | ☐ | ☐ | ☐ |
| 1. I can effectively use academic language and terminology. | ☐ | ☐ | ☐ | ☐ | ☐ |
| 1. I ensure consistent formatting in my research paper. | ☐ | ☐ | ☐ | ☐ | ☐ |
| 1. I follow specific citation styles accurately. | ☐ | ☐ | ☐ | ☐ | ☐ |

| Research Process Management | Strongly Disagree | Disagree | Neutral | Agree | Strongly Agree |
| --- | --- | --- | --- | --- | --- |
| 1. I can manage my time and resources in research writing. | ☐ | ☐ | ☐ | ☐ | ☐ |
| 1. I use appropriate technology tools for research efficiency. | ☐ | ☐ | ☐ | ☐ | ☐ |
| 1. I can troubleshoot difficulties during research writing. | ☐ | ☐ | ☐ | ☐ | ☐ |
| 1. I seek help from instructors, librarians, or peers when needed. | ☐ | ☐ | ☐ | ☐ | ☐ |

**Part 3: Attitudes Towards Using ChatGPT in Academic Writing *(10-item Likert Scale)***

| Attitudes Toward ChatGPT Items | Strongly Disagree | Disagree | Neutral | Agree | Strongly Agree |
| --- | --- | --- | --- | --- | --- |
| 1. ChatGPT can be helpful for brainstorming research ideas. | ☐ | ☐ | ☐ | ☐ | ☐ |
| 1. I feel comfortable using ChatGPT for research assistance. | ☐ | ☐ | ☐ | ☐ | ☐ |
| 1. Using ChatGPT to generate academic text is unethical. | ☐ | ☐ | ☐ | ☐ | ☐ |
| 1. ChatGPT can help improve my writing by suggesting revisions. | ☐ | ☐ | ☐ | ☐ | ☐ |
| 1. I am concerned that ChatGPT might hinder my learning development. | ☐ | ☐ | ☐ | ☐ | ☐ |
| 1. Using ChatGPT for assignments is a form of cheating. | ☐ | ☐ | ☐ | ☐ | ☐ |
| 1. ChatGPT can save me time and effort in writing papers. | ☐ | ☐ | ☐ | ☐ | ☐ |
| 1. I worry ChatGPT might generate inaccurate or biased information. | ☐ | ☐ | ☐ | ☐ | ☐ |
| 1. I am open to using ChatGPT as a collaborative writing tool. | ☐ | ☐ | ☐ | ☐ | ☐ |
| 1. ChatGPT use in academic writing should be regulated or prohibited. | ☐ | ☐ | ☐ | ☐ | ☐ |

**Part 4: Knowledge of ChatGPT *(20 True-False Items)***

| Knowledge of ChatGPT Items | True | False |
| --- | --- | --- |
| 1. ChatGPT is a language model developed by OpenAI. | ☐ | ☐ |
| 1. ChatGPT can generate text indistinguishable from human-written text. | ☐ | ☐ |
| 1. ChatGPT's knowledge base is updated in real time. | ☐ | ☐ |
| 1. ChatGPT can be accessed through a web interface or API. | ☐ | ☐ |
| 1. The development of ChatGPT started in 2022. | ☐ | ☐ |
| 1. ChatGPT is based on the GPT-3 language model. | ☐ | ☐ |
| 1. "GPT" in ChatGPT stands for "Generative Pre-trained Transformer." | ☐ | ☐ |
| 1. ChatGPT can assist in brainstorming research ideas. | ☐ | ☐ |
| 1. ChatGPT can help in drafting literature reviews. | ☐ | ☐ |
| 1. ChatGPT can generate citations in various styles. | ☐ | ☐ |
| 1. ChatGPT provides feedback on grammar and writing style. | ☐ | ☐ |
| 1. ChatGPT can translate academic texts between languages. | ☐ | ☐ |
| 1. ChatGPT's responses are always factually accurate. | ☐ | ☐ |
| 1. Using ChatGPT to generate full essays without attribution is ethical. | ☐ | ☐ |
| 1. Overreliance on ChatGPT hinders critical thinking. | ☐ | ☐ |
| 1. ChatGPT can sometimes generate incorrect or nonsensical information. | ☐ | ☐ |
| 1. Detecting AI-generated text is always easy. | ☐ | ☐ |
| 1. ChatGPT use in academia is universally accepted. | ☐ | ☐ |
| 1. Ethical concerns exist regarding ChatGPT in education. | ☐ | ☐ |
| 1. The future development of ChatGPT is uncertain. | ☐ | ☐ |
